# Supplementary material
Source: PubMed Central journal article supplement (PMC3059048)
Supplement: supp_M110.207290_jbc.M110.207290-2.pdf [file supp_M110.207290_jbc.M110.207290-2.pdf]

SWI5 homologues

```

*      20      *      40      *      60      *      80      *      100      *      120
Homo sapiens      : --MQRRGQRDLWRHNKSCARNRCPRPPRERGGAGFPWVRAQLSVRQFTLRVVRVPGPVHLRGRSPTPALDPLAPLNPLIRGERTPGLRRWIQSLALLLPNCSSSRIPTVVRPHSGLWVQSDFPLG : 122
Pan troglodytes   : MGAQRRGQRDLWRHNKSCARNRCPRPPRERGGAGFPWVRAQLSVRQFTLRVVRVPCPVHLRGRSPTPALDPLAPLNPLIRGERTPGLRRWIQSLALLLPNCSSSRIPTVVRPHSGLWVQSDFPLG : 124
Mus musculus      : ----- : -
Rattus norvegicus : ----- : -
Danio rerio       : -----MNETAELQMNTQPVSDDAHVKVTPR-----QGGVSSK : 32
Xenopus (Silurana) tropicalis : ----- : -
Schizosaccharomyces pombe : ----- : -
Saccharomyces cerevisiae : ----- : -
  
```

```

                                coiled-coil motif                                MEI5 binding region
*      140      *      160      *      180      *      200      *      220      *
Homo sapiens      : FLSRTEPRLTRSCRGAFRSRPLPKSGQADGTSSEESLHLDIQKLKKEKRDMLLKEISQFVSEEGYSVDELED-HITQLHEYNDIKDVGQMLMGKLAIVIRGVTTKELYPEFGLDMND : 235
Pan troglodytes   : FLSRTEPRLTRSCRGAFRSRPLPKSGQADGTSSEESLHLDIQKLKKEKRDMLLKEISQFVSEEGYSVDELED-HITQLHEYNDIKDVGQMLMGKLAIVIRGVTTKELYPEFGLDMND : 237
Mus musculus      : -----MIDENNDVSEEAALSSDIKKLKEKHDMLLKEISQLIAEGYRVIELEK-HISLLHEYNDIKDVSQMLLGKLAIVIRGVTTKELYPDEDLNIND : 89
Rattus norvegicus : -----MIDEGEEVTEETLNSDIQKLKKEKQDMLLKEISQLIAEGYRVIELEK-HISLLHEYNDIKDVSQMLLGKLAIVIRGVTTKELYPDEDLNIND : 89
Danio rerio       : RRLSESRCNSRSVNSGFKSPVLKPSMVKS---PVCLEEEVKEKKTQDCLSEIASLEKEGFVVOELDQ-HIDLLHEYNDIKDVGQMLLGKLAIVIRGVTTKELYPEFGLDLD : 141
Xenopus (Silurana) tropicalis : -----MRRNCKAGFKSPVQSPSSSSSGRGSEYSLQKEVSEIQGKEAALDQETIAQLESEGEFSMAELEEE-HITLLHEYNELKDVQMLLGRLAIVIRGVTTKELYVEFGMNLED : 105
Schizosaccharomyces pombe : -----MEKSQLESRVHLEQQKEQLES---LQDALAKLKNRD-AKQTVQK-HIDLLHTYNEIRDIALGMIGKVAEHEKCTSVLEFDREGVNGSE : 85
Saccharomyces cerevisiae : -----MNYLETQLNKKQKQIQ-EYESMNGNLIKMFEQLSKEKKNDETPKKISSTYIKELKEYNELRDAGLRLAQITLADKQCKIKDVFEEICYSMKD : 91
                                6      6      6d      6      eg      e6      hI      LheYN 64D  q  6  g  6A  gvt  e65  fg  d
  
```
