# Supplementary material
Source: PubMed Central journal article supplement (PMC3059048)

MEI5 homologues

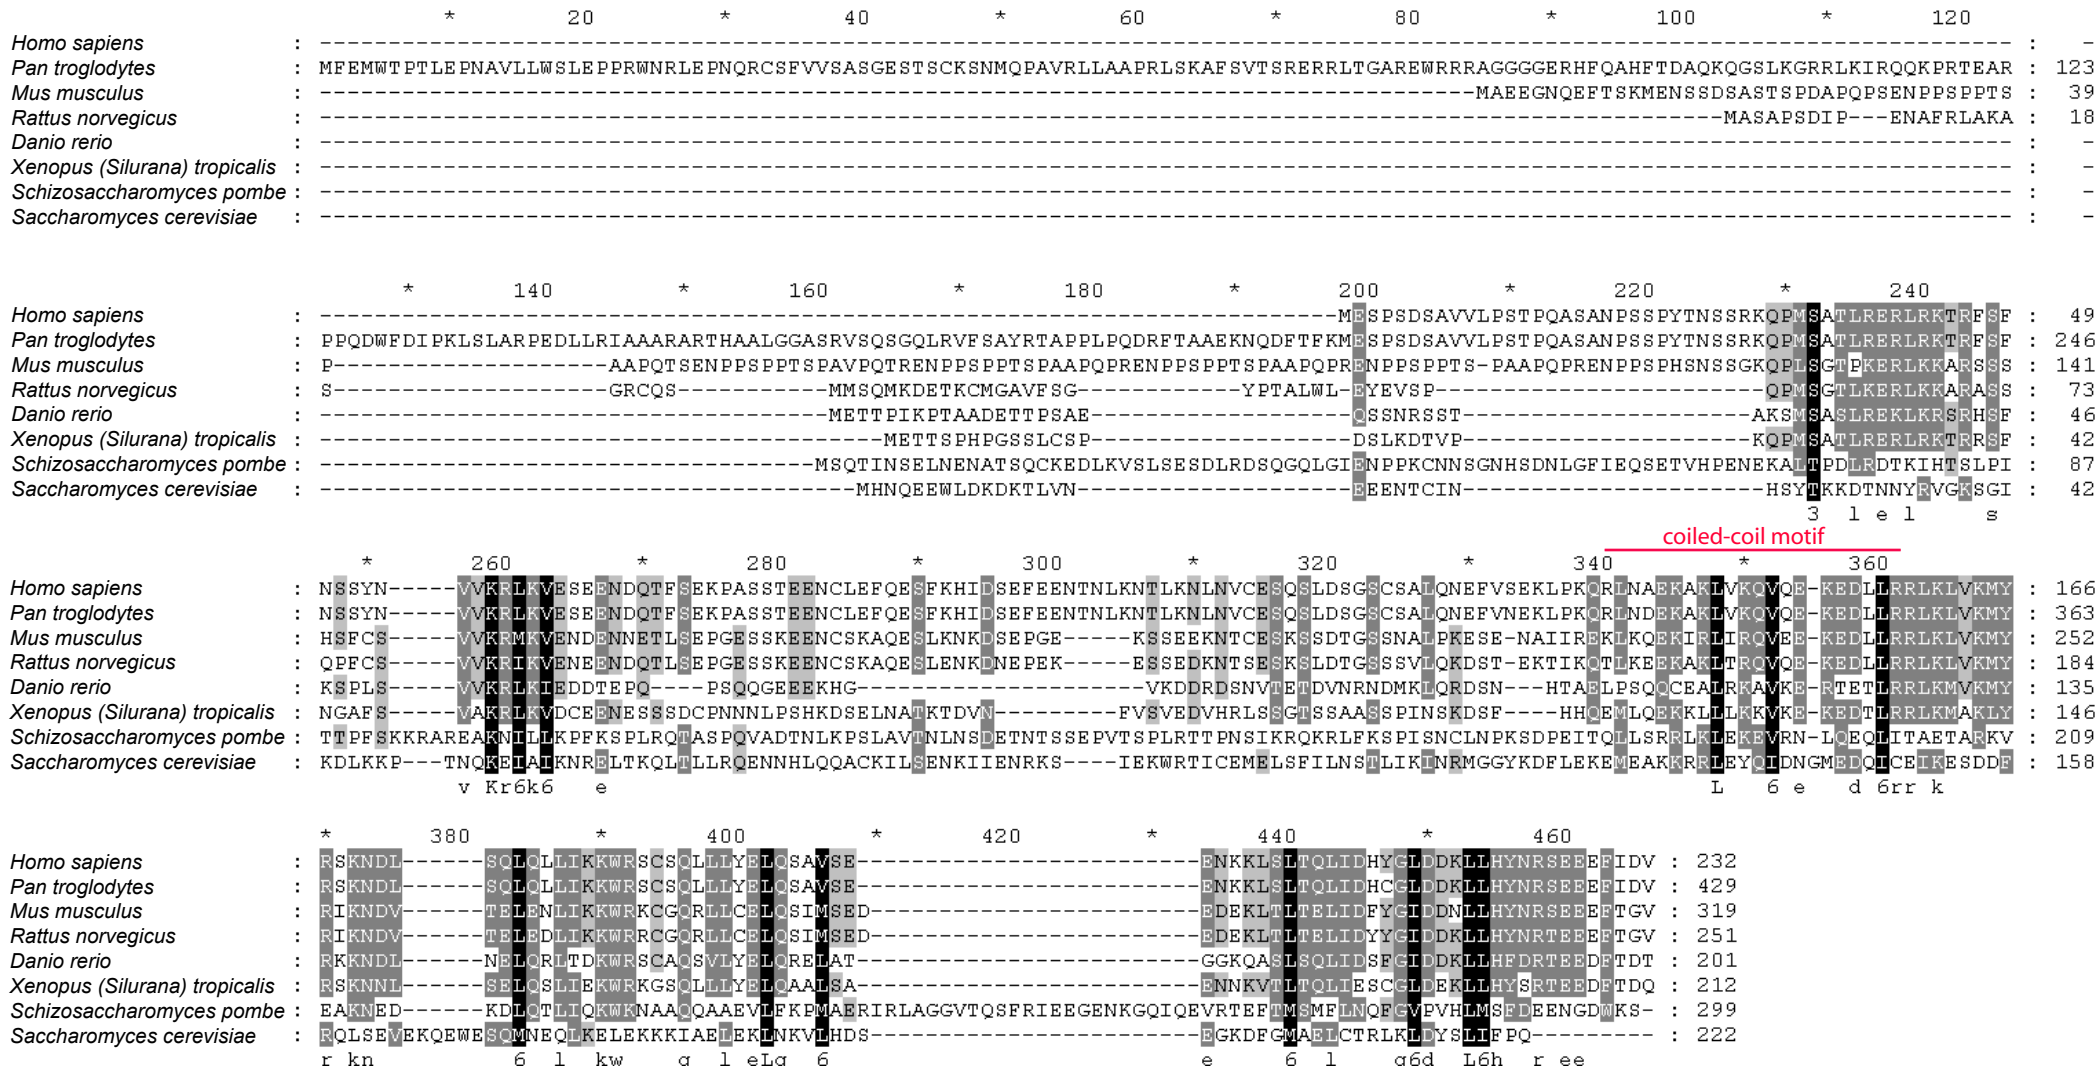

Supplement: supp_M110.207290_jbc.M110.207290-3.pdf [file supp_M110.207290_jbc.M110.207290-3.pdf]

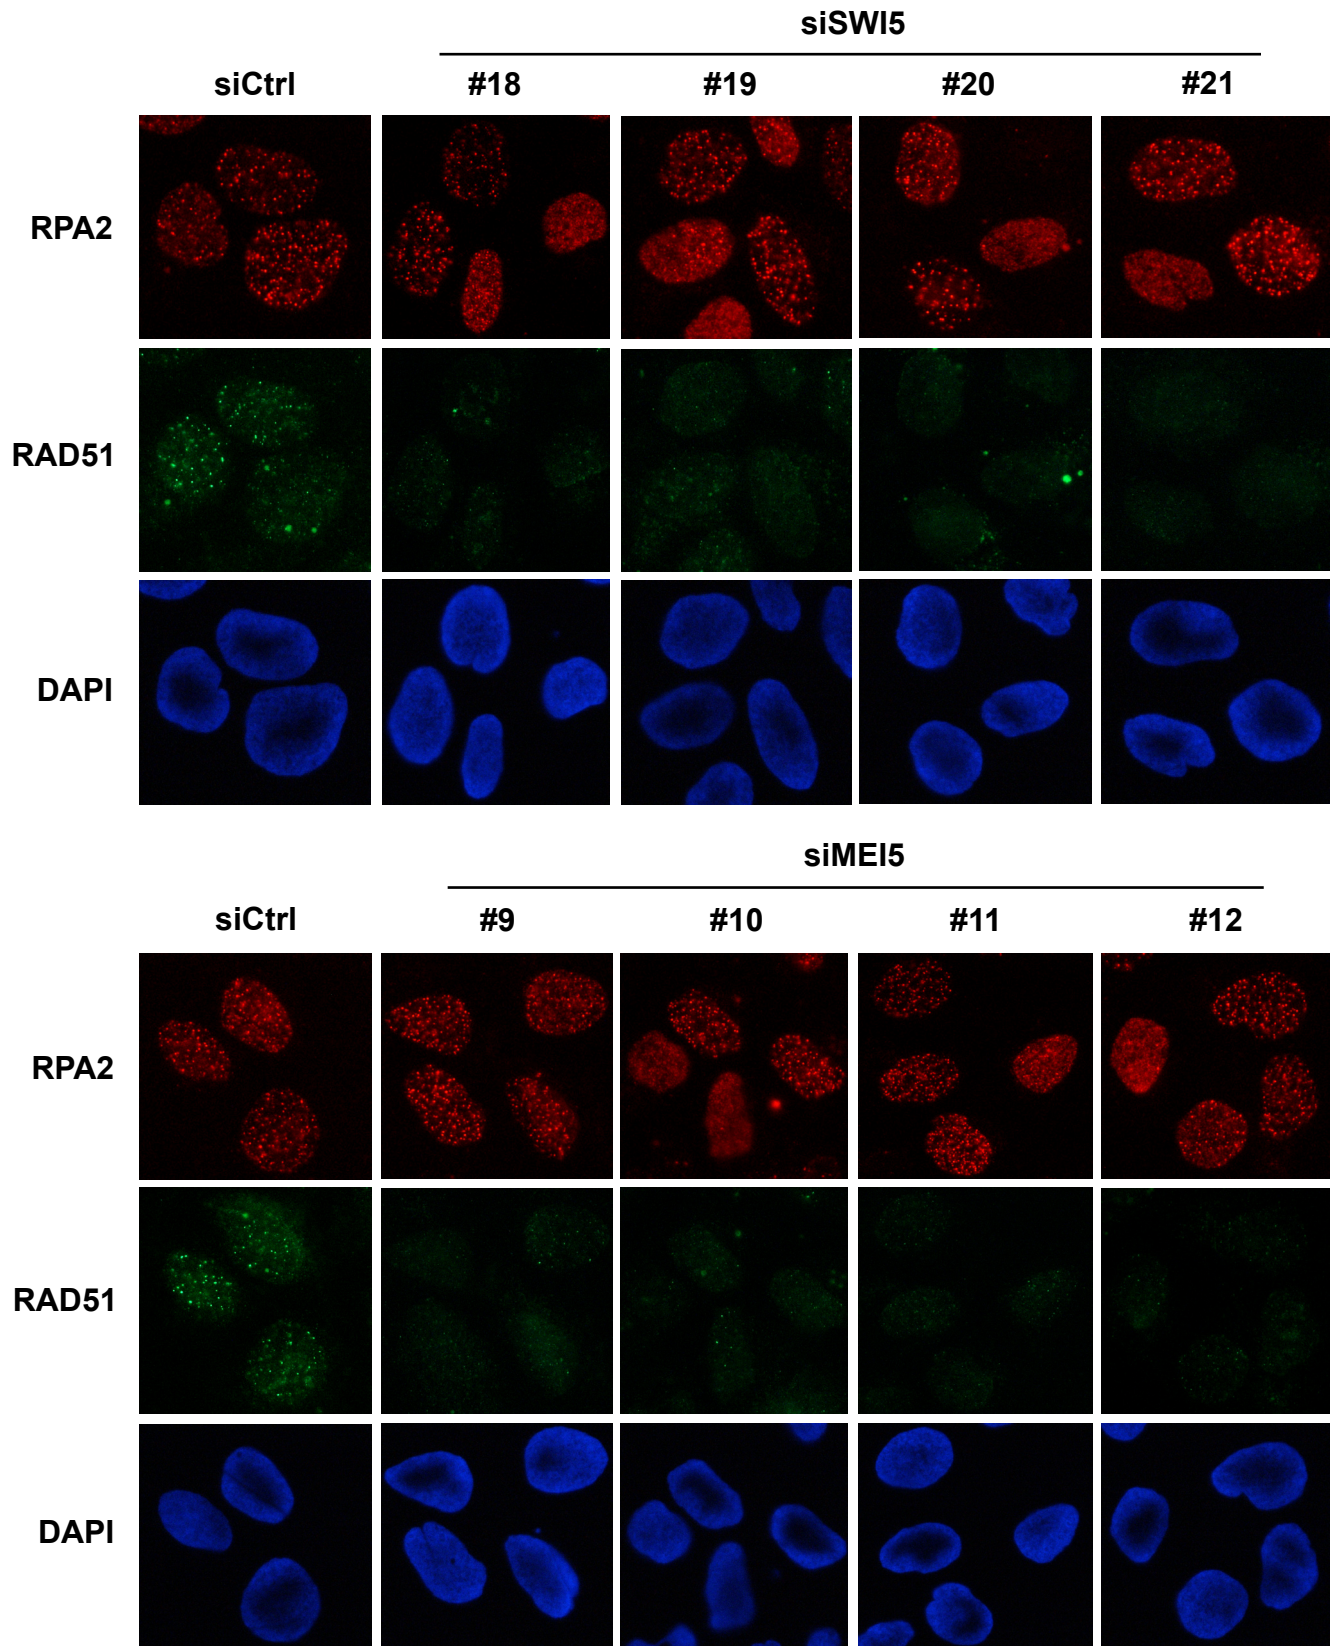

Supplement: supp_M110.207290_jbc.M110.207290-4.pdf [file supp_M110.207290_jbc.M110.207290-4.pdf]
